# Supplementary material for: A higher voltage Fe(ii) bipyridine complex for non-aqueous redox flow batteries
Source: Royal Society of Chemistry journal article supplement (doi:10.1039/d0dt03927f), 2020-12-14
Supplement: d0dt03927f1.pdf [file d0dt03927f1.pdf]

Electronic Supplementary Information

# A Higher Voltage Fe(II) Bipyridine Complex for Non-Aqueous Redox Flow Batteries

Claudina X. Cammack,<sup>a</sup> Harry D. Pratt III,<sup>a</sup> Leo J. Small,<sup>a</sup> Travis M. Anderson<sup>a\*</sup>

<sup>a</sup> Sandia National Laboratories, Albuquerque, New Mexico, 87185-0613, USA

\*Email: [tmander@sandia.gov](mailto:tmander@sandia.gov)

## I. Synthesis

Ferrocenium tetrafluoroborate (FcBF<sub>4</sub>) was prepared according to literature procedure.<sup>1</sup>

Synthesis of 1,1'-di(trifluoroborate)-2,2'-bipyridinium: bpy (1.34 g, 8.6 mmol) was dissolved in diethyl ether (10 mL) and flushed with N<sub>2</sub>. The solution was cooled to 0 °C, and BF<sub>3</sub>·OEt<sub>2</sub> was added dropwise with fast-stirring, turning the solution into a cloudy-white mixture. The reaction continued stirring while warming to room temperature overnight. The white precipitate was filtered and dried under vacuum (2.37 g, 94 %). <sup>1</sup>H NMR (500 MHz, DMSO-*d*<sub>6</sub>): δ 8.83 (dd, *J* = 5.1, 2.2 Hz, 2H), 8.57 (d, *J* = 8.1 Hz, 2H), 8.27 (td, *J* = 7.8, 1.8 Hz, 2H), 7.75 (dd, *J* = 7.2, 5.5 Hz, 2H). <sup>13</sup>C (125 MHz, acetone-*d*<sub>6</sub>): δ 147.70, 147.34, 144.64, 128.56, 124.47. HRMS: Calcd. for C<sub>10</sub>H<sub>8</sub>BF<sub>3</sub>N<sub>2</sub> [M<sup>+</sup>] *m/z* 224.0847, found 224.0763.

## II. Preparation of post-battery samples for characterization:

Post-battery cyclic voltammogram solutions were prepared by diluting the catholyte and anolyte samples (assembled as 0.2 M) in the respective 0.5 M supporting electrolyte down to 10 mM: 100 μL catholyte/anolyte and 1.9 mL supporting electrolyte.

UV-Vis spectroscopy solutions on post-battery samples were prepared by diluting 0.2 μL in 3 mL of 0.5 M TEABF<sub>4</sub> in propylene carbonate to determine post-cycling concentration.

MALDI mass spectrometry samples were prepared by diluting catholyte and anolyte samples (~ 2 mL) in dichloromethane (~ 7 mL) and washing the organic layer with water (~ 100 mL) two times. The organic layer was then concentrated under reduced pressure. Supporting electrolyte salt needed to be removed prior to MS analysis.

<sup>1</sup>H NMR samples were prepared by diluting catholyte and anolyte samples in acetone-*d*<sub>6</sub>.

## III. Figures

**Figure S1:** Discharge capacity change of Fe(bpy)<sub>3</sub>(BF<sub>4</sub>)<sub>2</sub> in 5 supporting electrolytes over 20 cycles.

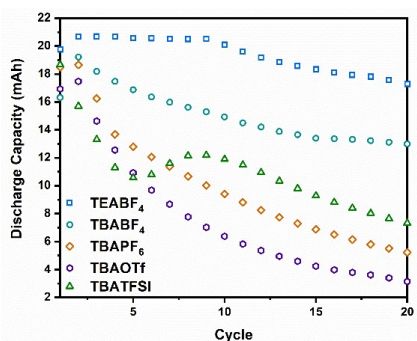

**Figure S2:** Post-battery cyclic voltammograms and  $^1\text{H}$  NMR spectra of analytes and catholytes from symmetric RFBs, compared to un-cycled  $\text{Fe}(\text{bpy})_3(\text{BF}_4)_2$  (10 mM), in various supporting electrolytes. Measured in the respective supporting electrolyte (0.5 M) in propylene carbonate, at  $100\text{ mV s}^{-1}$ , using a  $\text{Ag}/\text{AgCl}$  reference electrode in 0.5 M  $\text{TBABF}_4/\text{PC}$ , Pt wire counter electrode, and 3 mm glassy carbon working electrode.

A.  $\text{Fe}(\text{bpy})_3(\text{BF}_4)_2$  in  $\text{TEABF}_4/\text{PC}$

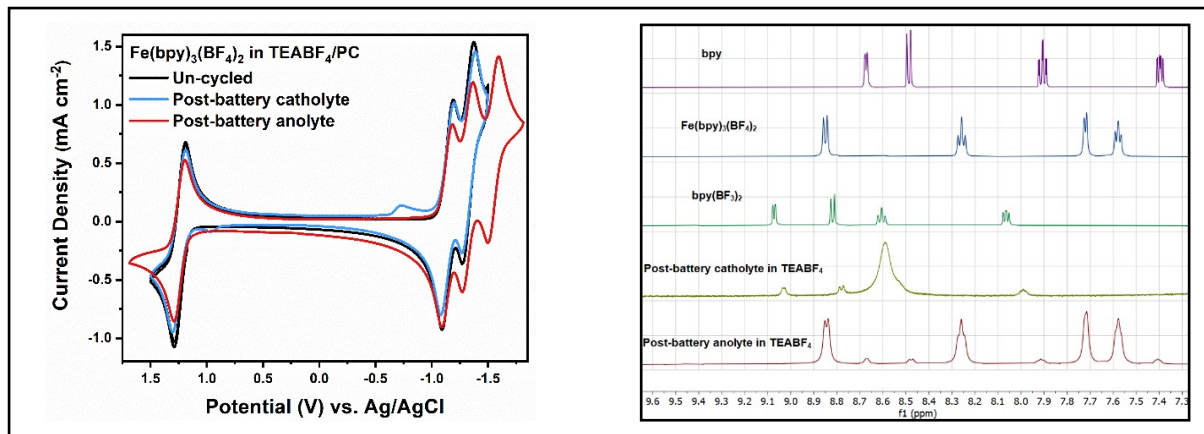

B.  $\text{Fe}(\text{bpy})_3(\text{BF}_4)_2$  in  $\text{TBABF}_4/\text{PC}$

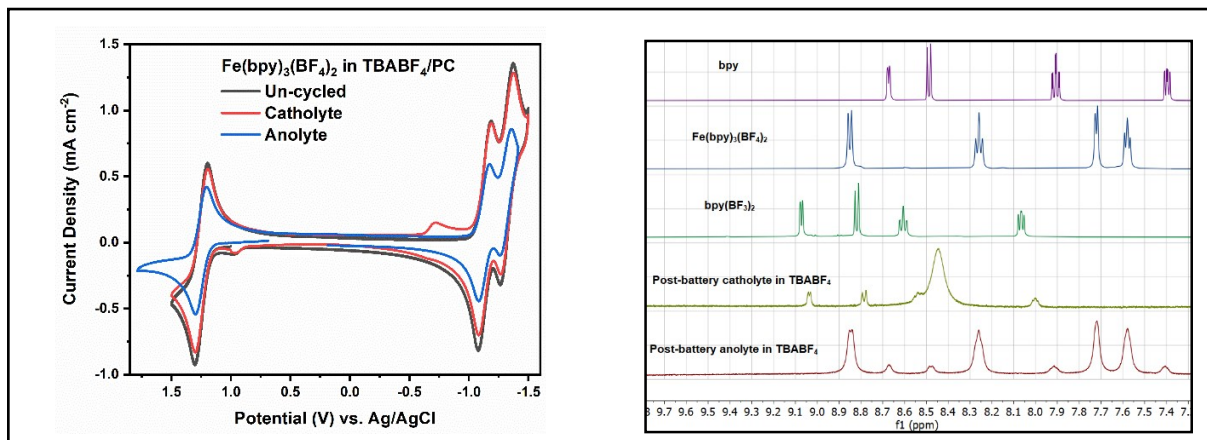

C.  $\text{Fe}(\text{bpy})_3(\text{BF}_4)_2$  in  $\text{TBAPF}_6/\text{PC}$

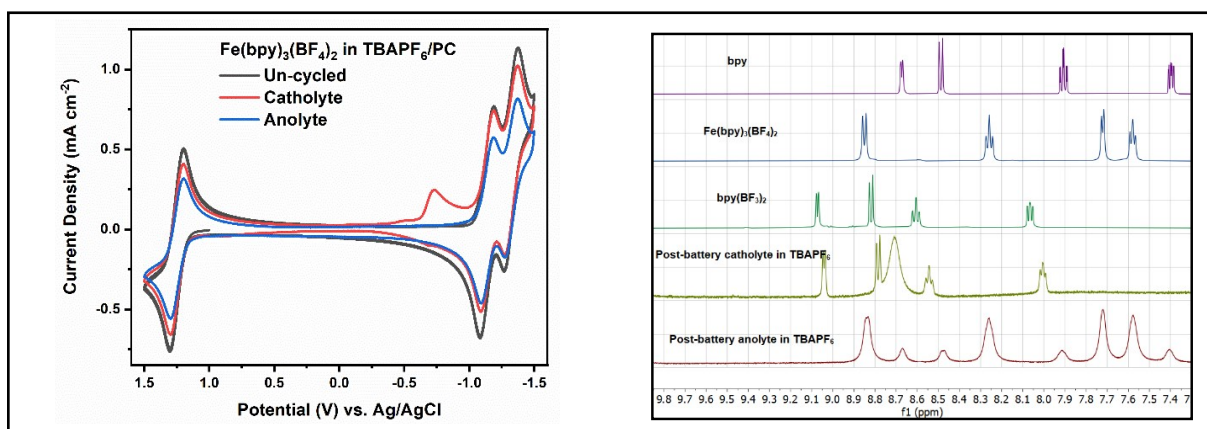

D.  $\text{Fe}(\text{bpy})_3(\text{BF}_4)_2$  in TBAOTf/PC

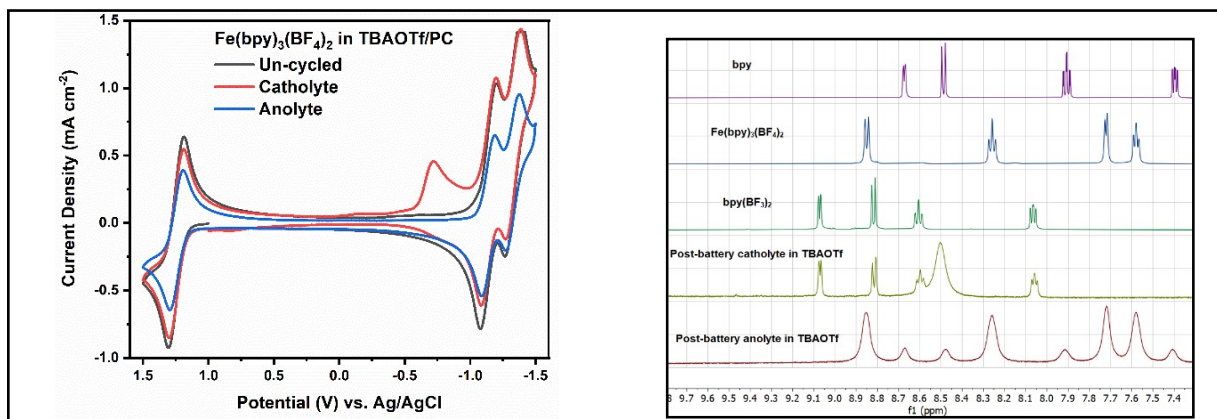

E.  $\text{Fe}(\text{bpy})_3(\text{BF}_4)_2$  in TBATFSI/PC

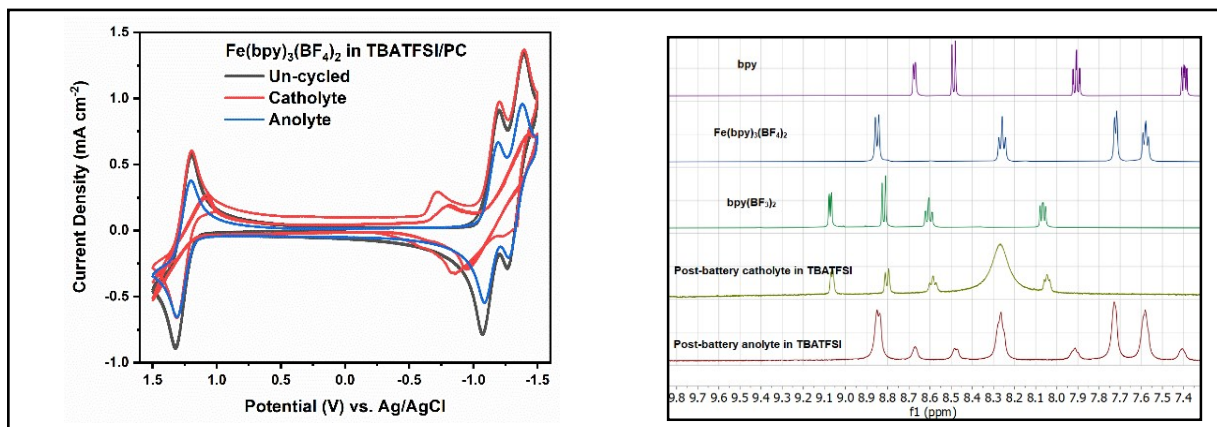

**Figure S3:** Un-cycled  $\text{Fe}(\text{bpy})_3(\text{BF}_4)_2$  in TBATFSI/PC (0.5 M) and post-battery catholyte before and after counteranion exchange.

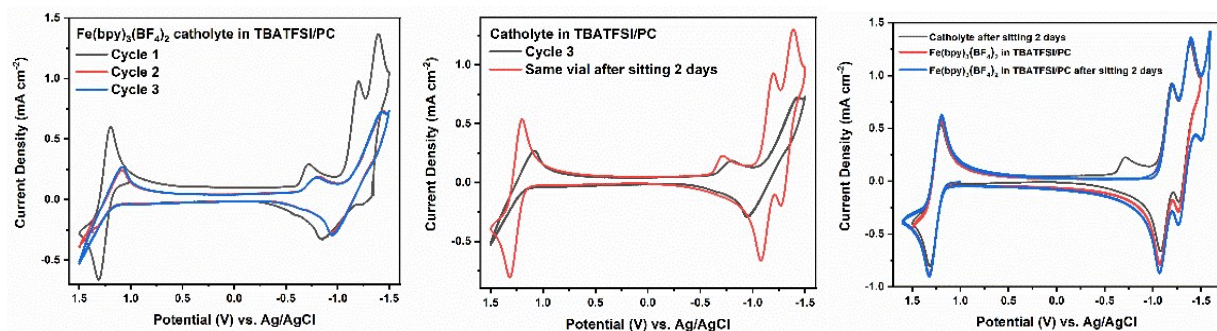



**Figure S4:** Absorbance spectra of each Fe bpy complex in propylene carbonate.

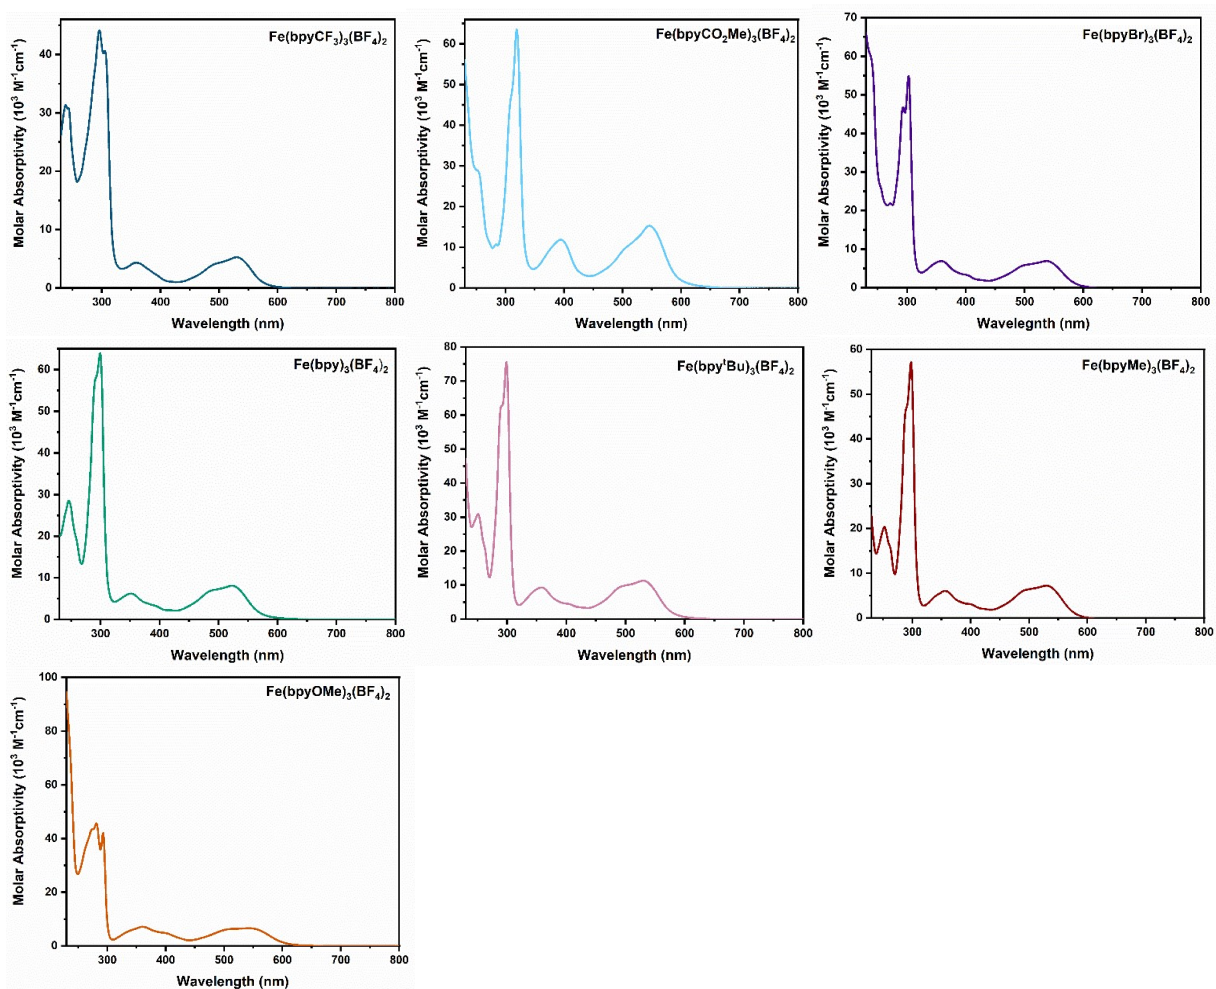

**Figure S5:** Scan rates and diffusion coefficients of  $\text{Fe}(\text{bpyR})_3(\text{BF}_4)_2$  (10 mM) in 0.5 M  $\text{TEABF}_4/\text{PC}$ , ranging from 25 to 500  $\text{mV s}^{-1}$ , using a  $\text{Ag}/\text{AgCl}$  reference electrode in 0.5 M  $\text{TBABF}_4/\text{PC}$ , Pt wire counter electrode, and 3 mm glassy carbon working electrode.

A.  $\text{Fe}(\text{bpyCF}_3)_3(\text{BF}_4)_2$

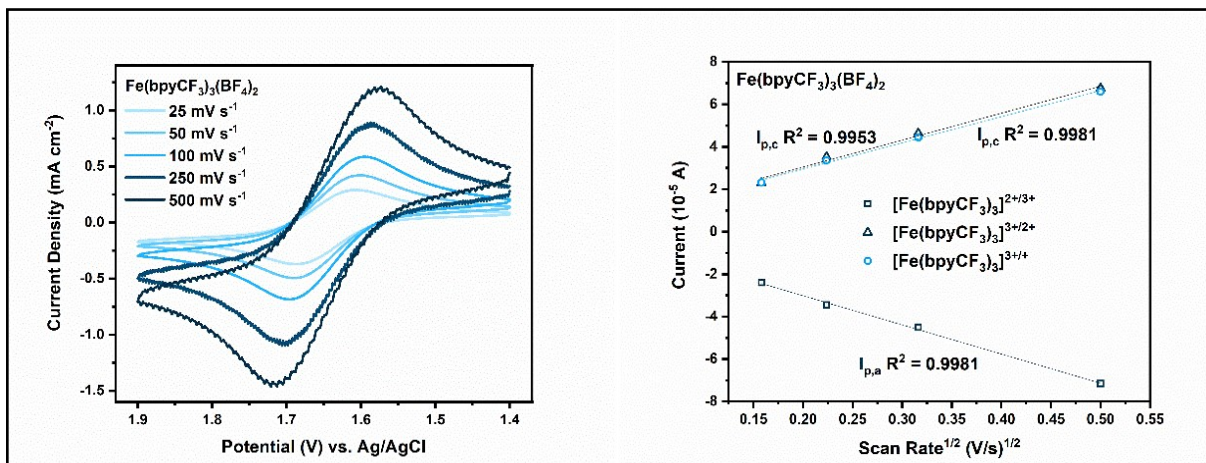

B.  $\text{Fe}(\text{bpyCO}_2\text{Me})_3(\text{BF}_4)_2$

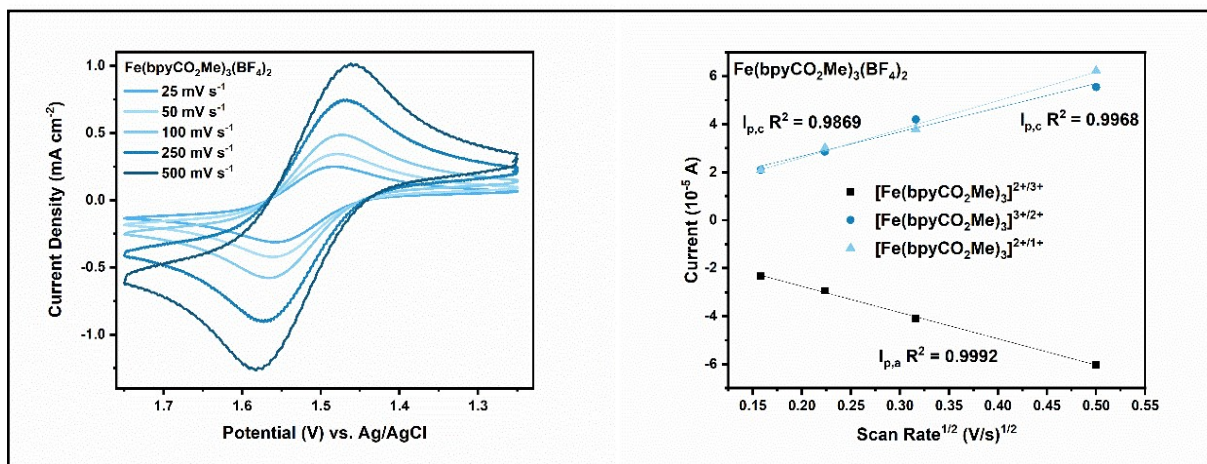

C.  $\text{Fe}(\text{bpyBr})_3(\text{BF}_4)_2$

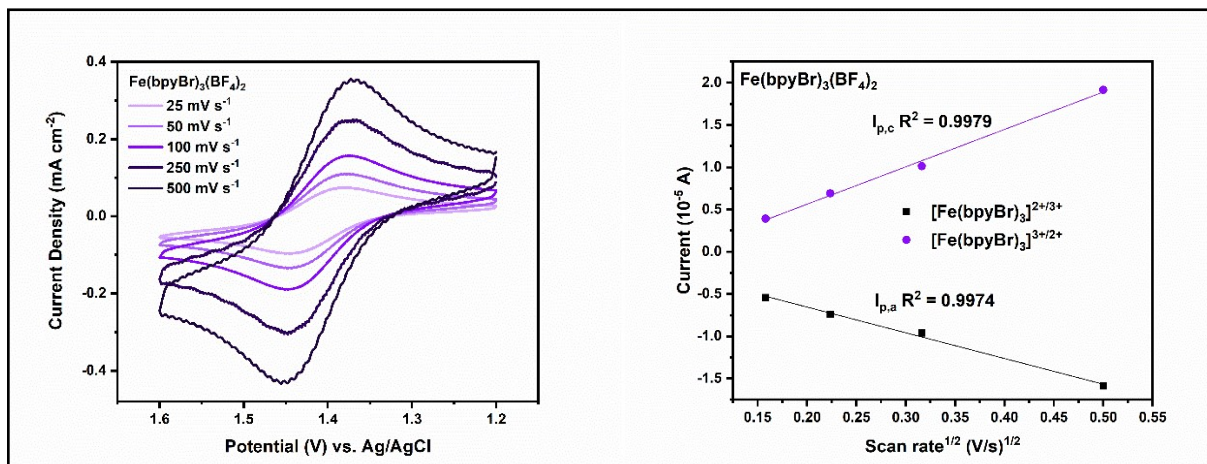

D.  $\text{Fe}(\text{bpy})_3(\text{BF}_4)_2$

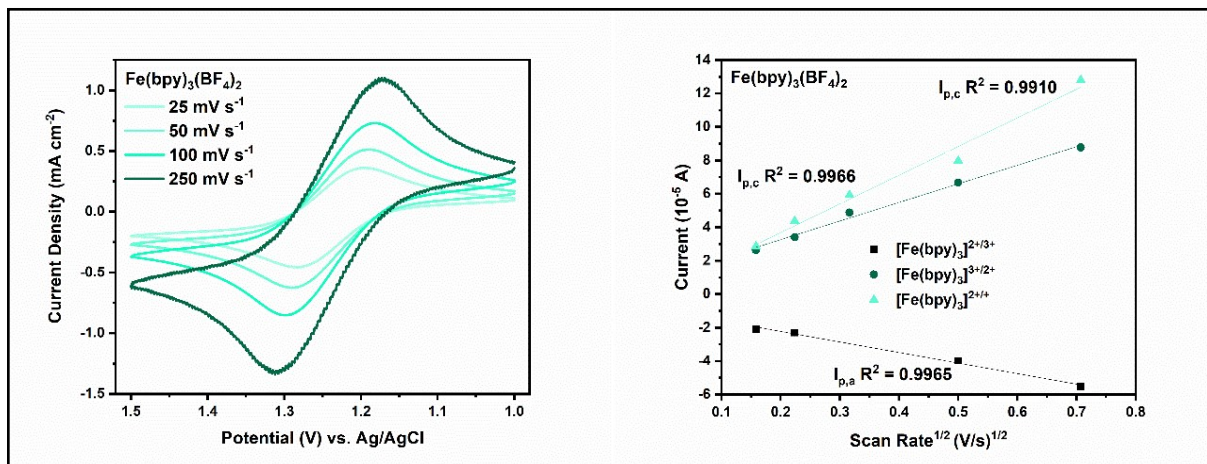



E.  $\text{Fe}(\text{bpy}^t\text{Bu})_3(\text{BF}_4)_2$

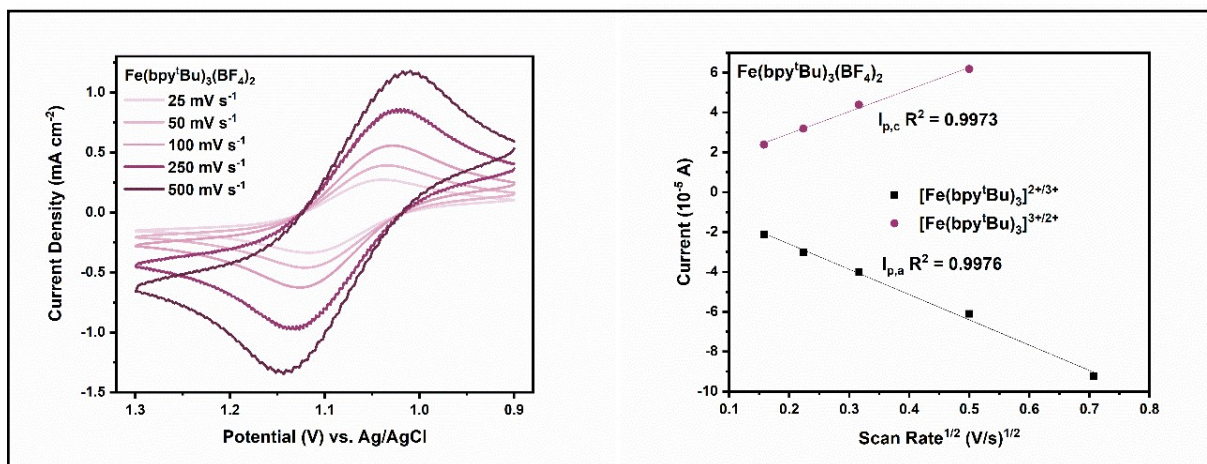

F.  $\text{Fe}(\text{bpyMe})_3(\text{BF}_4)_2$

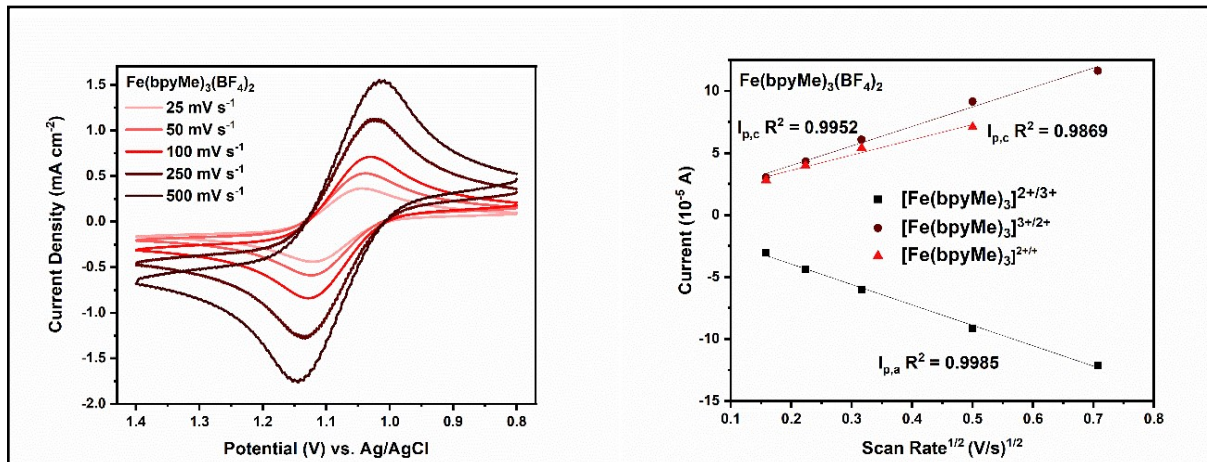

G.  $\text{Fe}(\text{bpyOMe})_3(\text{BF}_4)_2$

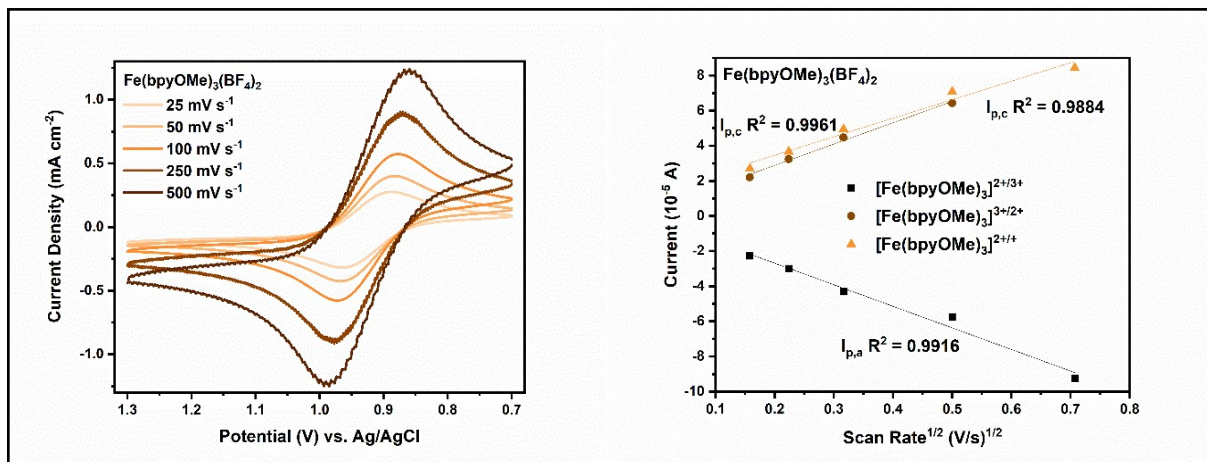

**Figure S6:** Electrochemical analysis of  $\text{Fe}(\text{bpyNH}_2)_3(\text{BF}_4)_2$ -Nafion thin film measured using a  $\text{Ag}/\text{AgCl}$  reference electrode in 0.5 M  $\text{TBABF}_4/\text{PC}$ , Pt wire counter electrode, and 3 mm glassy carbon working electrode. A mixture of  $\text{Fe}(\text{bpyNH}_2)_3(\text{BF}_4)_2$  (25.4 mg) in 7 mL acetone, 2 mL isopropanol, and 1 mL 5 % Nafion solution was sonicated for 5 minutes and drop-casted onto a glassy carbon working electrode.

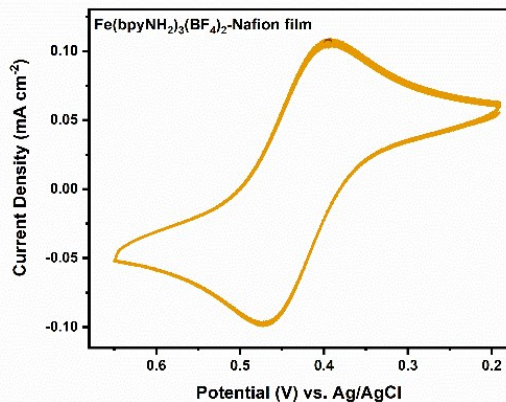

**Figure S7:** Post-battery cyclic voltammograms and  $^1\text{H}$  NMR of symmetric  $\text{Fe}(\text{bpyCF}_3)_3(\text{BF}_4)_2$  catholyte and anolyte.

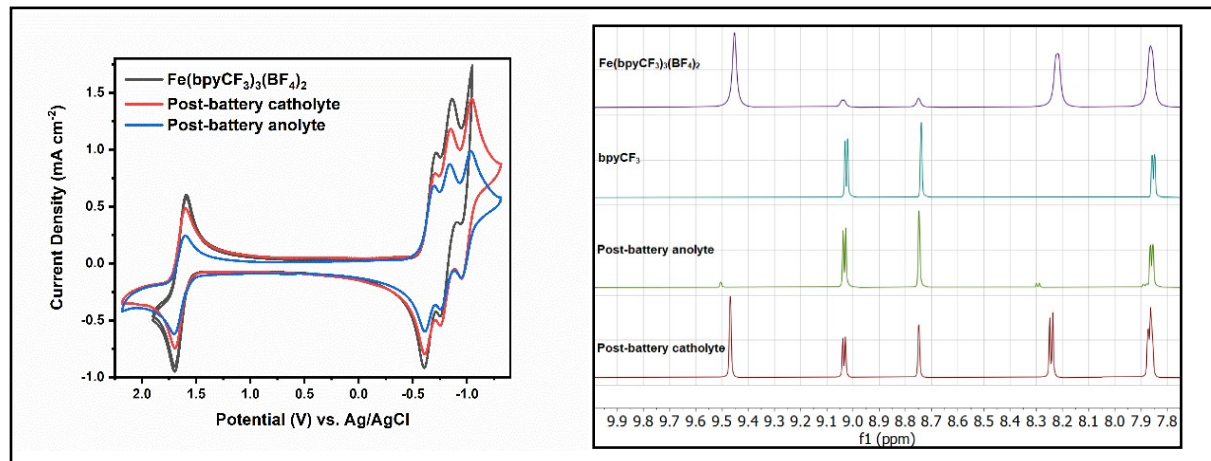

**Figure S8:** MALDI-MS of symmetric  $\text{Fe}(\text{bpyCF}_3)_3(\text{BF}_4)_2$  catholyte. Modeled  $\text{Fe}(\text{bpyCF}_3)_3$  catholyte  $[\text{M}+\text{H}]^+$  (top) and detected (bottom) in low concentrations.

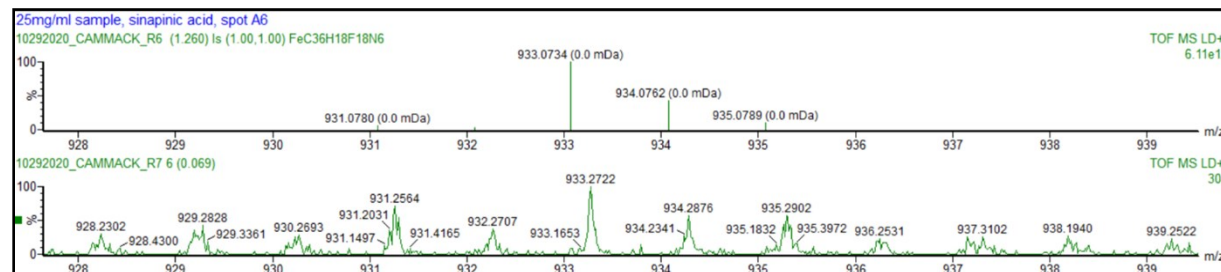

**Figure S9:** Post-battery cyclic voltammograms and  $^1\text{H}$  NMR of  $\text{Fe}(\text{bpyOME})_3(\text{BF}_4)_2$  catholyte and anolyte.

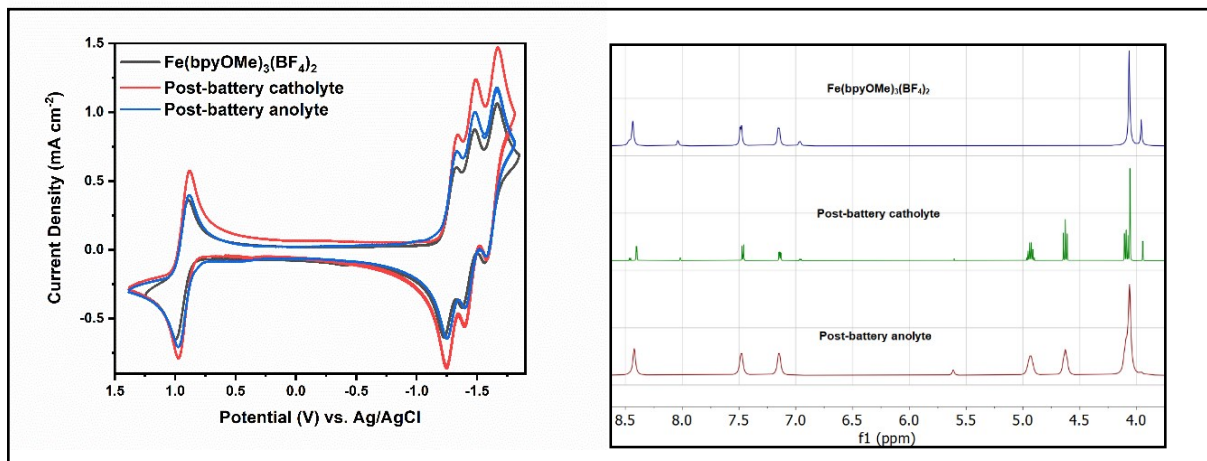

**Figure S10:** Post-battery cyclic voltammograms and  $^1\text{H NMR}$  of Optimized catholyte and anolyte.

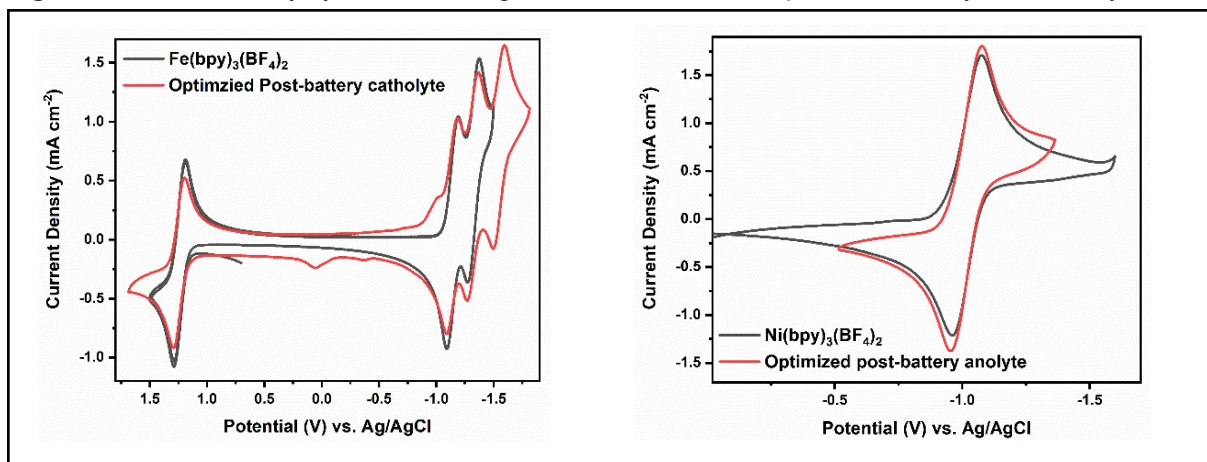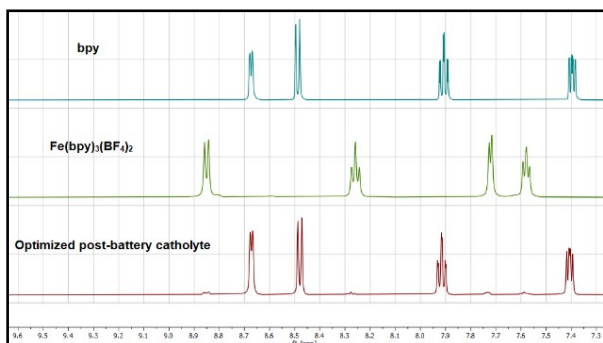

**Figure S11:** MALDI-MS of Optimized catholyte and anolyte.



A. Modeled  $\text{Fe}(\text{bpy})_3$   $[\text{M}+\text{H}]^+$  (top) and detected (bottom) at low concentrations in catholyte.

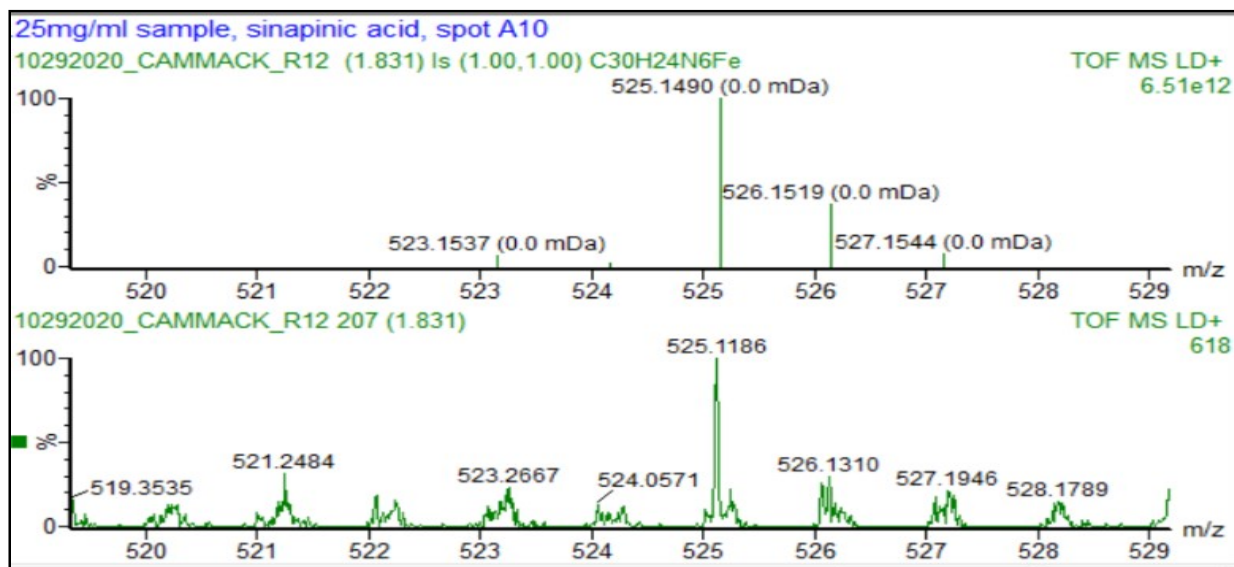

B. Modeled hydrolysis products  $[\text{M}+\text{H}]^+$  (top 3), sinapinic acid reference, and observed by-products in catholyte.

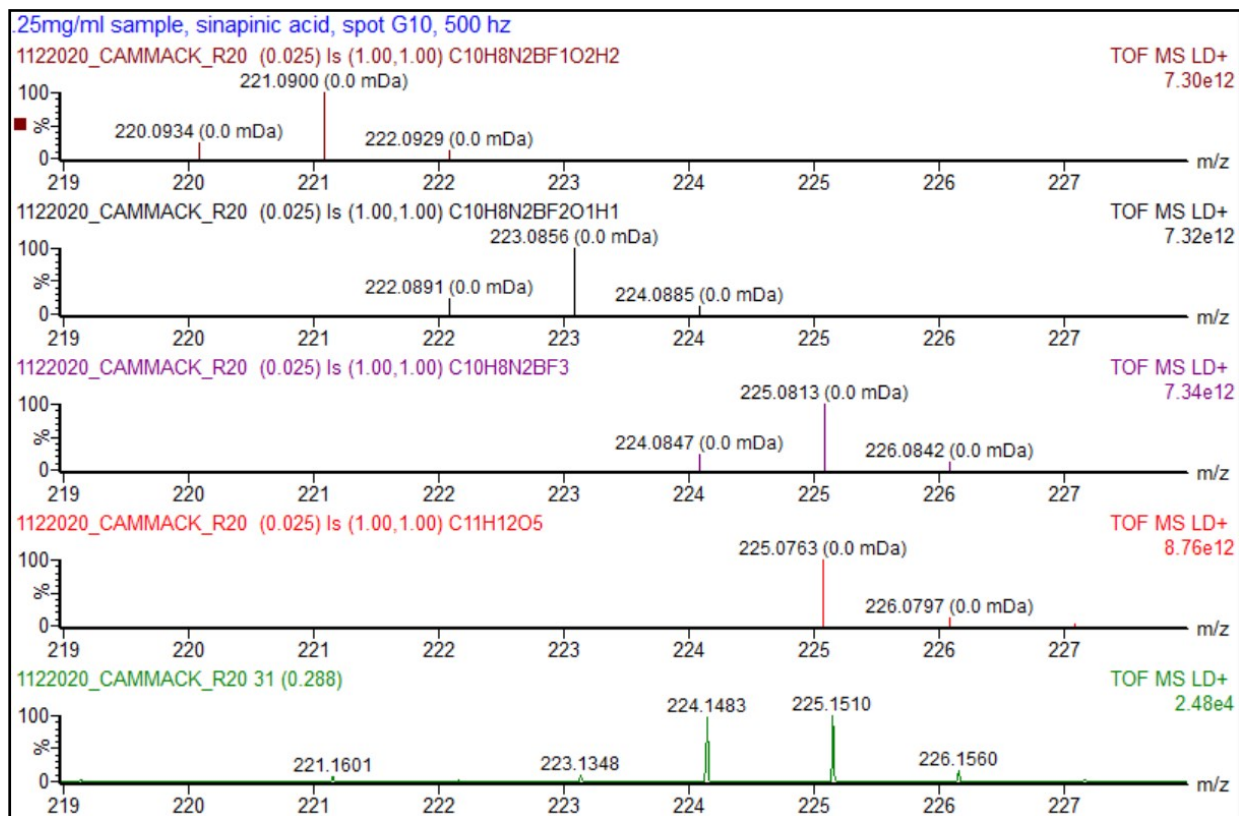

C. Modeled bpy  $[\text{M}+\text{H}]^+$  (top) and detected bpy in anolyte. Ni(bpy)<sub>3</sub> could not be detected.

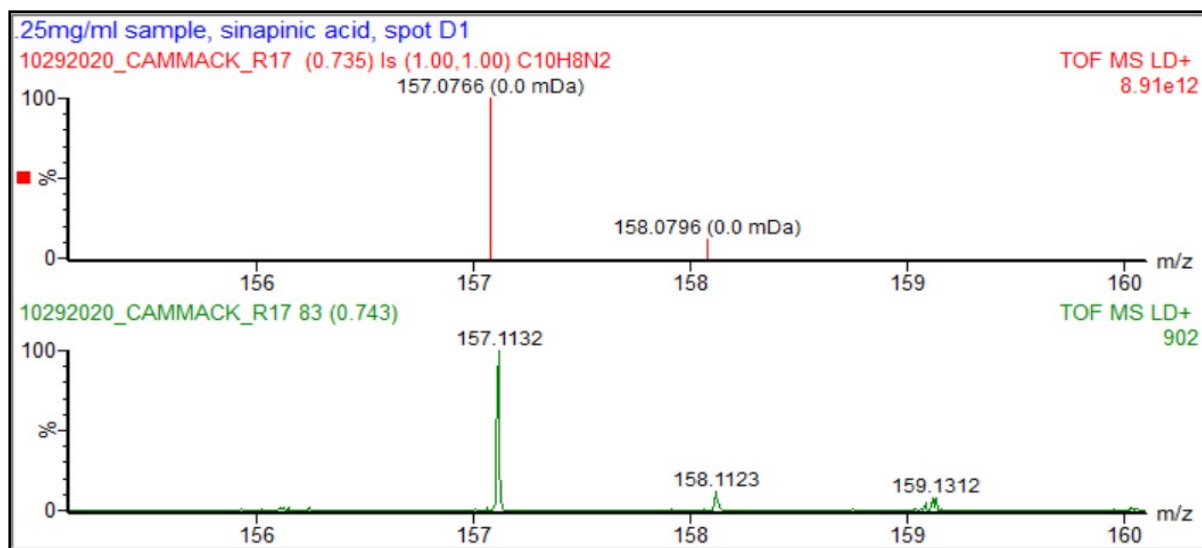

**Figure S12:** Post-battery cyclic voltammograms of  $\text{Fe}(\text{bpyCF}_3)_3(\text{BF}_4)_2/\text{FcBF}_4$ .

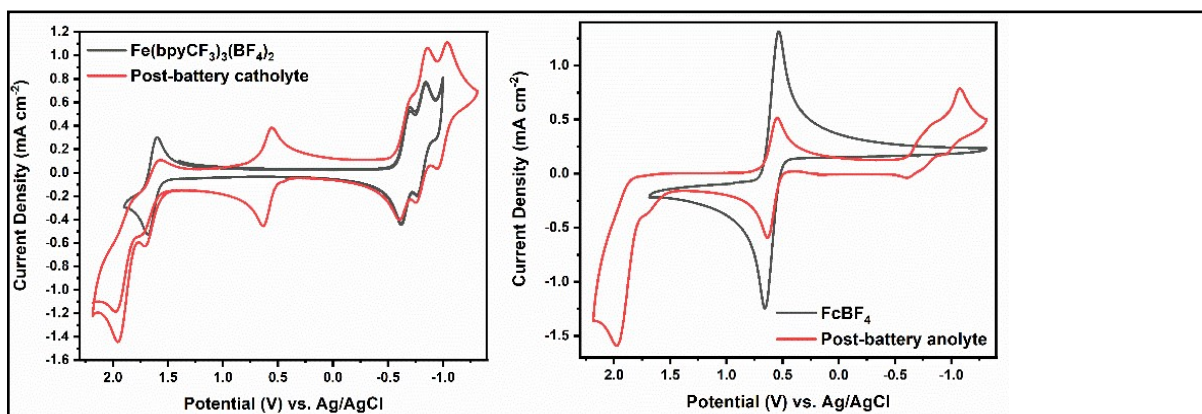

**Figure S13:** Post-battery cyclic voltammograms of Next Gen catholyte and anolyte.

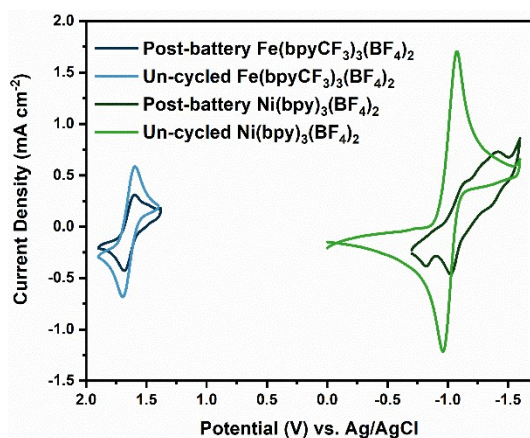

**Figure S14:** Post-battery MALDI-MS of Next Gen catholyte and anolyte.

A. Modeled  $\text{bpy}(\text{CF}_3)(\text{CF}_2(\text{OH}))$  (top) and detected (bottom) in catholyte.

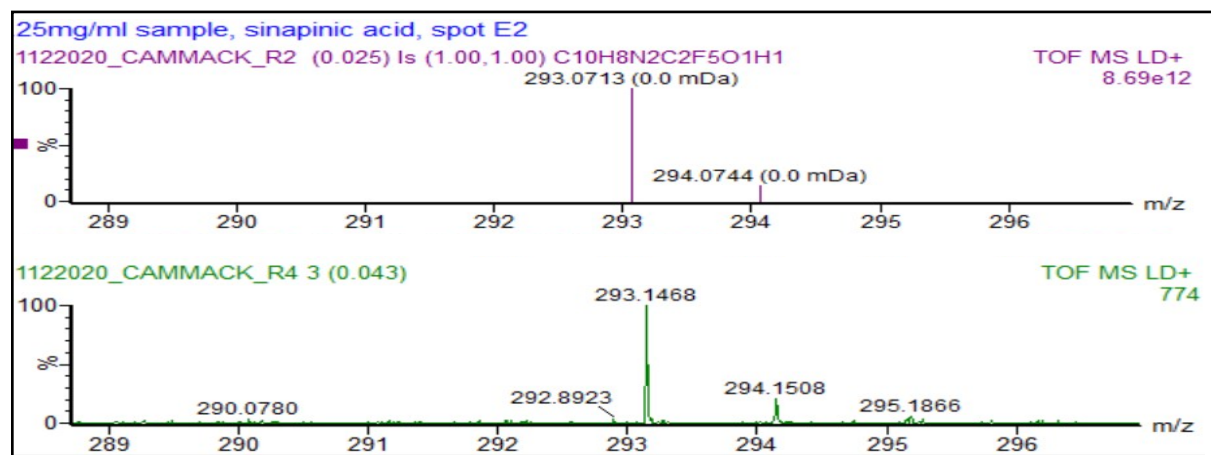

B. Modeled  $\text{bpy}(\text{BF}_3)_1$   $[\text{M}+\text{H}]^+$  (top) and observed (bottom), plus additional hydrolysis products in catholyte.

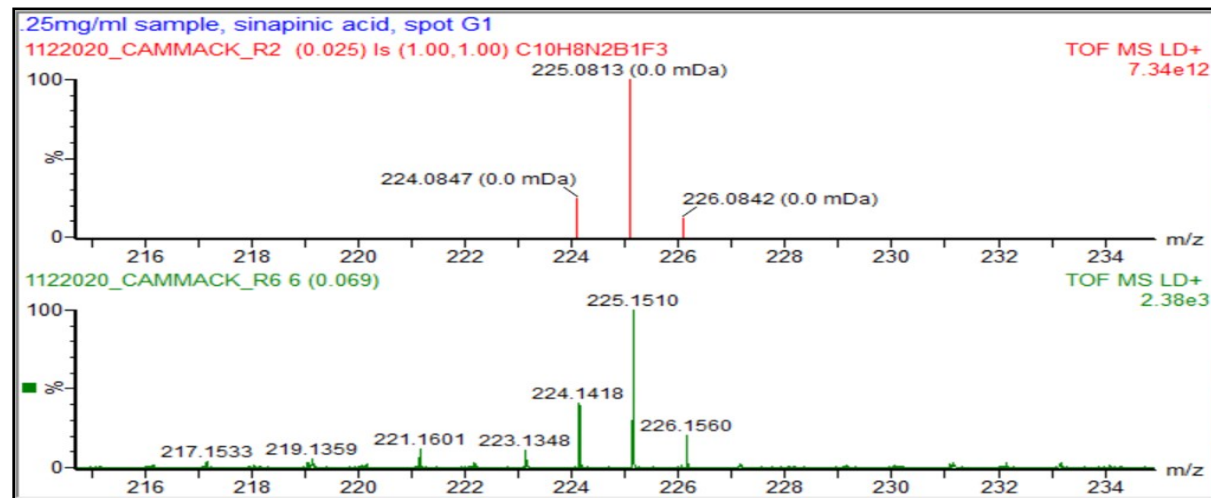

C. Modeled  $\text{bpy} [\text{M}+\text{H}]^+$  (top) and observed (bottom) in anolyte.

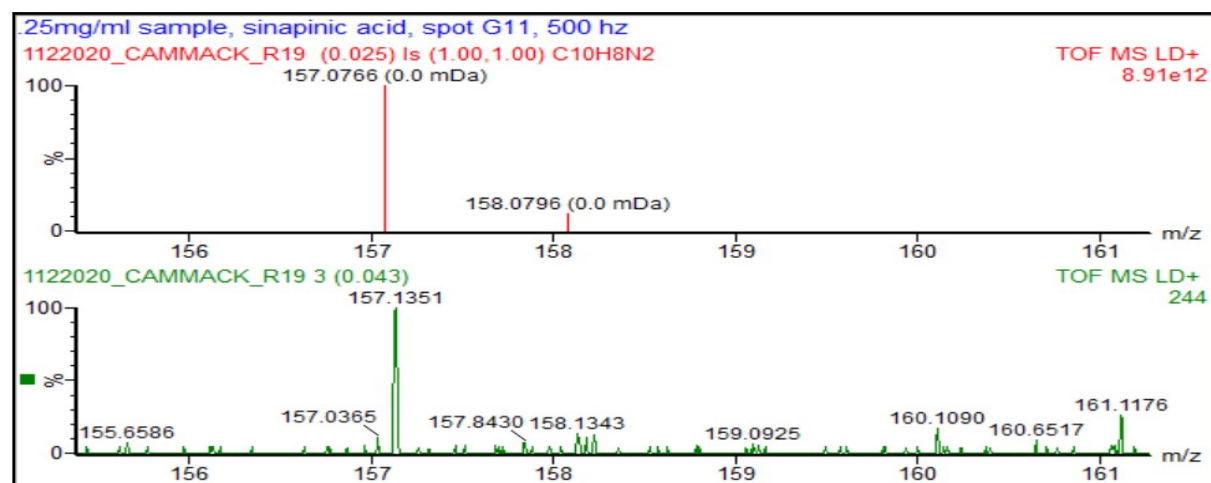

Figure S15: Post-battery cyclic voltammograms and <sup>1</sup>H NMR of  $\text{Fe}(\text{bpyCF}_3)_3(\text{BF}_4)_2 / \text{Fe}(\text{bpy})_3(\text{BF}_4)_2$ .



A.  $\text{Fe}(\text{bpyCF}_3)_3(\text{BF}_4)_2$  catholyte.

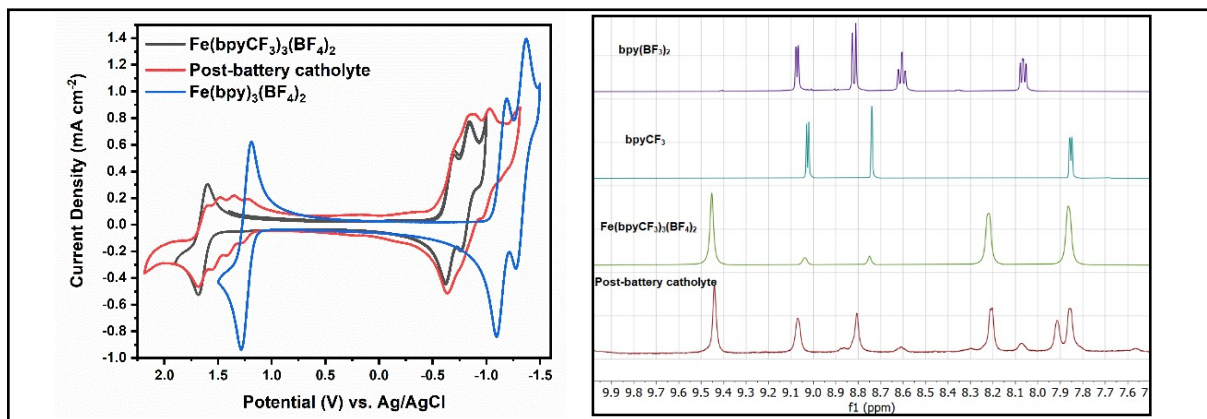

B.  $\text{Fe}(\text{bpy})_3(\text{BF}_4)_2$  anolyte.

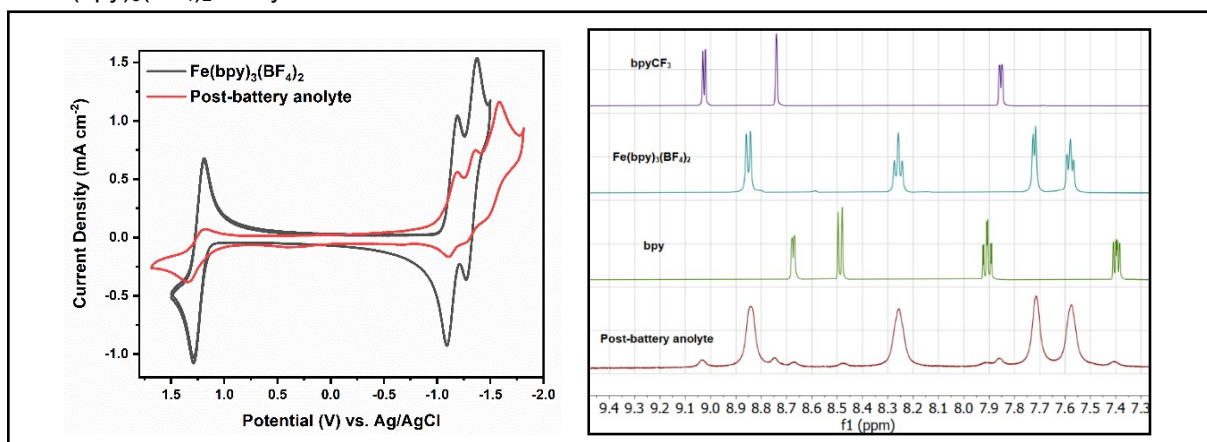

**Figure S16:** Standard curves of  $\text{Fe}(\text{bpy})_3(\text{BF}_4)_2$ ,  $\text{Fe}(\text{bpyCF}_3)_3(\text{BF}_4)_2$ , and  $\text{Fe}(\text{bpyOMe})_3(\text{BF}_4)_2$  in 0.5 M TEABF<sub>4</sub>/PC and post-battery catholyte and anolyte absorbance measurements of symmetric  $\text{Fe}(\text{bpy})_3(\text{BF}_4)_2$ , symmetric  $\text{Fe}(\text{bpyCF}_3)_3(\text{BF}_4)_2$ , symmetric  $\text{Fe}(\text{bpyOMe})_3(\text{BF}_4)_2$ , Optimized catholyte, Next Gen catholyte, and asymmetric  $\text{Fe}(\text{bpyCF}_3)_3(\text{BF}_4)_2/\text{Fe}(\text{bpy})_3(\text{BF}_4)_2$  catholyte and anolyte.

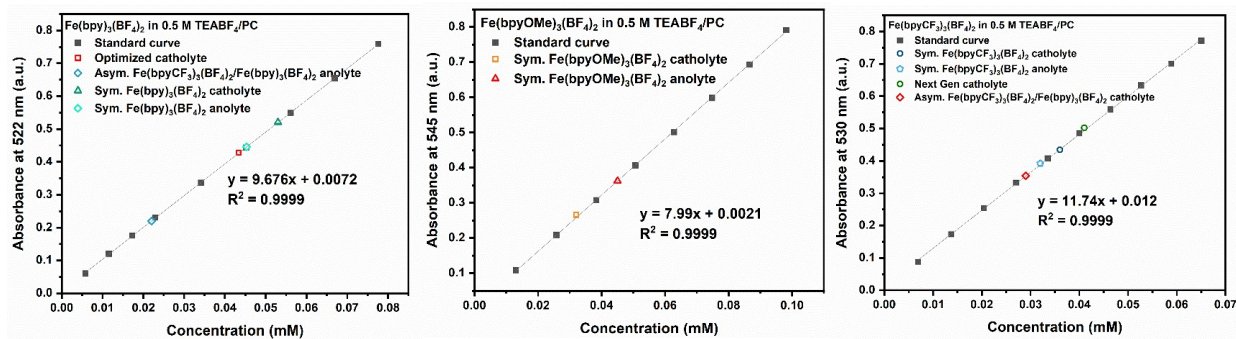

**Table 1:** Calculated concentrations of post-battery catholytes and anolytes determined from the standard curves in Figure S12.

| <b>Catholytes</b>                                                          | <b>Start: 0.2 M</b> | <b>Anolytes</b>                                                           | <b>Start: 0.2 M</b> |
|----------------------------------------------------------------------------|---------------------|---------------------------------------------------------------------------|---------------------|
| Sym. Fe(bpy) <sub>3</sub> (BF <sub>4</sub> ) <sub>2</sub>                  | 0.795 M             | Sym. Fe(bpy) <sub>3</sub> (BF <sub>4</sub> ) <sub>2</sub>                 | 0.679 M             |
| Sym. Fe(bpyCF <sub>3</sub> ) <sub>3</sub> (BF <sub>4</sub> ) <sub>2</sub>  | 0.538 M             | Sym. Fe(bpyCF <sub>3</sub> ) <sub>3</sub> (BF <sub>4</sub> ) <sub>2</sub> | 0.480 M             |
| Sym. Fe(bpyOMe) <sub>3</sub> (BF <sub>4</sub> ) <sub>2</sub>               | 0.495 M             | Sym. Fe(bpyOMe) <sub>3</sub> (BF <sub>4</sub> ) <sub>2</sub>              | 0.675 M             |
| Asym. Fe(bpyCF <sub>3</sub> ) <sub>3</sub> (BF <sub>4</sub> ) <sub>2</sub> | 0.435 M             | Asym. Fe(bpy) <sub>3</sub> (BF <sub>4</sub> ) <sub>2</sub>                | 0.330 M             |
| Optimized                                                                  | 0.651 M             |                                                                           |                     |
| Next Gen                                                                   | 0.630 M             |                                                                           |                     |

#### IV. References

- (1) Armstrong, C. G.; Hogue, R. W.; Toghiani, K. E. Characterisation of the Ferrocene/Ferrocenium Ion Redox Couple as a Model Chemistry for Non-Aqueous Redox Flow Battery Research. *J. Electroanal. Chem.* **2020**, 872, 114241. <https://doi.org/10.1016/j.jelechem.2020.114241>.
